# Supplementary material
Source: HighWire-hosted journal article supplement (https://bmjopen.bmj.com/content/12/8/e061993)
Supplement: inline-supplementary-material-2 [file inline-supplementary-material-2.pdf]

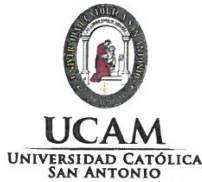

## COMITÉ DE ÉTICA DE LA UCAM

### DATOS DEL PROYECTO

|                               |                                                                                                                                                                                                                                 |                  |
|-------------------------------|---------------------------------------------------------------------------------------------------------------------------------------------------------------------------------------------------------------------------------|------------------|
| <b>Título:</b>                | “Maquinaria Bio-saludable Inteligente: Diseño y fabricación de nueva maquinaria de fitness outdoor ergonómica, eficiente, saludable y con aplicación para dispositivos móviles (App) de valoración y control del entrenamiento” |                  |
| <b>Investigador Principal</b> | <b>Nombre</b>                                                                                                                                                                                                                   | <b>Correo-e</b>  |
| Dr.                           | Pablo Jorge Marcos Pardo                                                                                                                                                                                                        | pmarcos@ucam.edu |

### INFORME DEL COMITÉ

|              |                   |               |                 |
|--------------|-------------------|---------------|-----------------|
| <b>Fecha</b> | <b>29/11/2019</b> | <b>Código</b> | <b>CE111908</b> |
|--------------|-------------------|---------------|-----------------|

#### Tipo de Experimentación

|                                                                                                            |   |
|------------------------------------------------------------------------------------------------------------|---|
| Investigación experimental clínica con seres humanos                                                       |   |
| Utilización de tejidos humanos procedentes de pacientes, tejidos embrionarios o fetales                    |   |
| Utilización de tejidos humanos, tejidos embrionarios o fetales procedentes de bancos de muestras o tejidos |   |
| Investigación observacional con seres humanos, psicológica o comportamental en humanos                     | X |
| Uso de datos personales, información genética, etc.                                                        | X |
| Experimentación animal                                                                                     |   |
| Utilización de agentes biológicos de riesgo para la salud humana, animal o las plantas                     |   |
| Uso de organismos modificados genéticamente (OMGs)                                                         |   |

#### Comentarios Respecto al Tipo de Experimentación

Nada Obsta

#### Comentarios Respecto a la Metodología de Experimentación

Nada Obsta

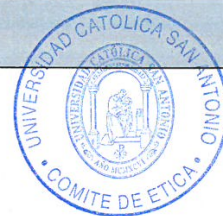

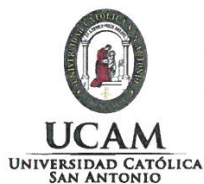

## COMITÉ DE ÉTICA DE LA UCAM

### Sugerencias al Investigador

A la vista de la solicitud de informe adjunto por el Investigador y de las recomendaciones anteriormente expuestas el dictamen del Comité es:

|                                                     |          |
|-----------------------------------------------------|----------|
| Emitir Informe Favorable                            | <b>X</b> |
| Emitir Informe Desfavorable                         |          |
| Emitir Informe Favorable condicionado a Subsanación |          |

### MOTIVACIÓN

Incrementará conocimientos en su área

Vº Bº El Presidente,

Fdo.: José Alberto Cánovas Sánchez

El Secretario,

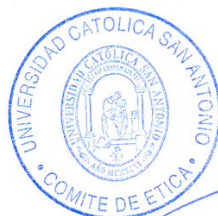

Fdo.: José Alarcón Teruel
