# Supplementary material
Source: HighWire-hosted journal article supplement (https://bmjopen.bmj.com/content/12/8/e061993)
Supplement: inline-supplementary-material-3 [file inline-supplementary-material-3.pdf]

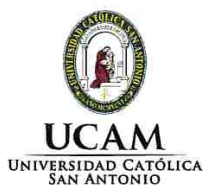

## COMITÉ DE ÉTICA DE LA UCAM

### DATOS DEL PROYECTO

|                               |                                                                                                                    |                  |
|-------------------------------|--------------------------------------------------------------------------------------------------------------------|------------------|
| <b>Título:</b>                | “COVID-19 y aislamiento social: Efectos sobre la condición física y la salud psico-fisiológica en adultos mayores” |                  |
| <b>Investigador Principal</b> | <b>Nombre</b>                                                                                                      | <b>Correo-e</b>  |
| Dr.                           | Pablo Jorge Marcos Pardo                                                                                           | pmarcos@ucam.edu |

### INFORME DEL COMITÉ

|              |            |               |          |
|--------------|------------|---------------|----------|
| <b>Fecha</b> | 29/05/2020 | <b>Código</b> | CE052002 |
|--------------|------------|---------------|----------|

#### Tipo de Experimentación

|                                                                                                            |   |
|------------------------------------------------------------------------------------------------------------|---|
| Investigación experimental clínica con seres humanos                                                       |   |
| Investigación experimental no clínica con seres humanos                                                    | X |
| Utilización de tejidos humanos procedentes de pacientes, personas sanas, tejidos embrionarios o fetales    |   |
| Utilización de tejidos humanos, tejidos embrionarios o fetales procedentes de bancos de muestras o tejidos |   |
| Investigación observacional con seres humanos, psicológica o comportamental en humanos                     | X |
| Uso de datos personales                                                                                    | X |
| Experimentación animal                                                                                     |   |
| Utilización de agentes biológicos de riesgo para la salud humana, animal o las plantas                     |   |
| Uso de organismos modificados genéticamente (OMGs)                                                         |   |

#### Comentarios Respecto al Tipo de Experimentación

Nada Obsta

#### Comentarios Respecto a la Metodología de Experimentación

Nada Obsta

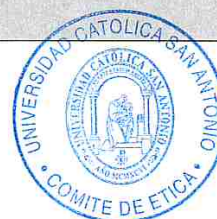

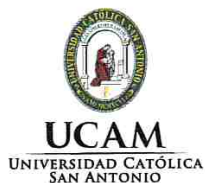

## COMITÉ DE ÉTICA DE LA UCAM

### Diretrizes al Investigador

No podrá iniciar el proyecto hasta que no disponga del permiso oficial del “Comité de Seguimiento UCAM COVID-19” para garantizar la seguridad de los participantes.

**A la vista de la solicitud de informe adjunto por el Investigador y de las directrices anteriormente expuestas el dictamen del Comité es:**

|                                                     |                                     |
|-----------------------------------------------------|-------------------------------------|
| Emitir Informe Favorable                            | <input checked="" type="checkbox"/> |
| Emitir Informe Desfavorable                         | <input type="checkbox"/>            |
| Emitir Informe Favorable condicionado a Subsanación | <input type="checkbox"/>            |

### MOTIVACIÓN

Incrementará conocimientos en su área

Vº Bº El Presidente,

Fdo.: José Alberto Cánovas Sánchez

El Secretario,

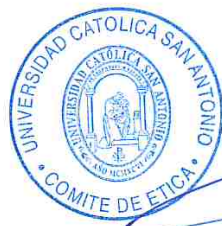

Fdo.: José Alarcón Teruel
